# Supplementary material for: Evolution of gut microbiota composition from birth to 24 weeks in the INFANTMET Cohort
Source: PubMed Central journal article supplement (PMC5240274; doi:10.1186/s40168-016-0213-y), 2017-01-17

# Spearman distances between twins and non-twins

Week 1

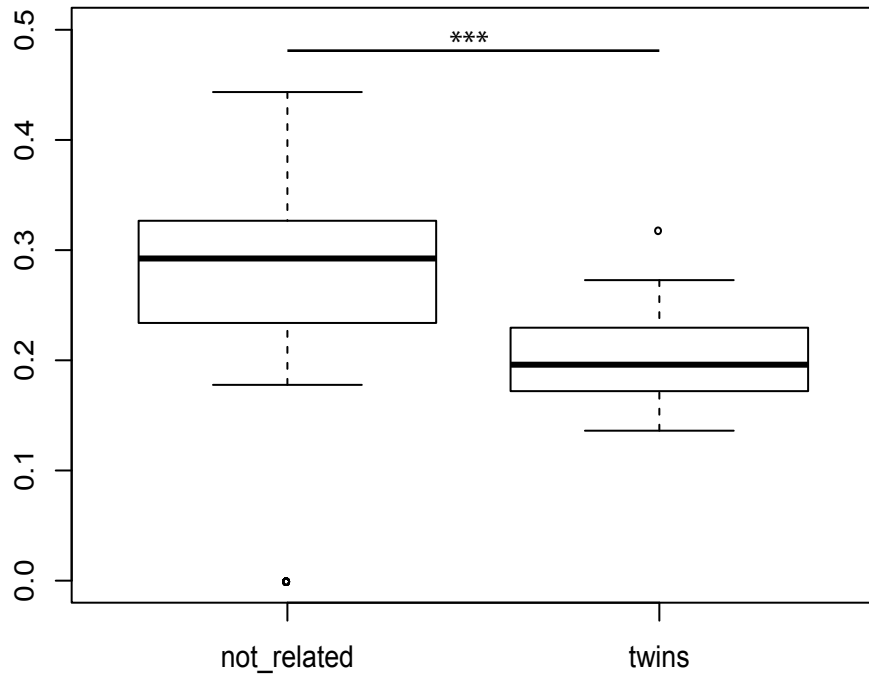

Week 4

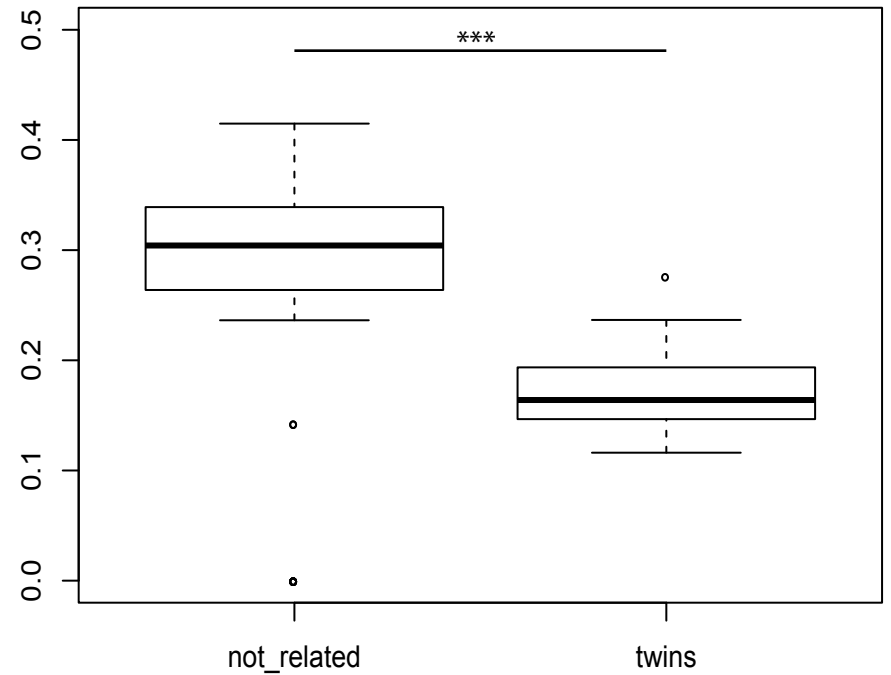

Week 8

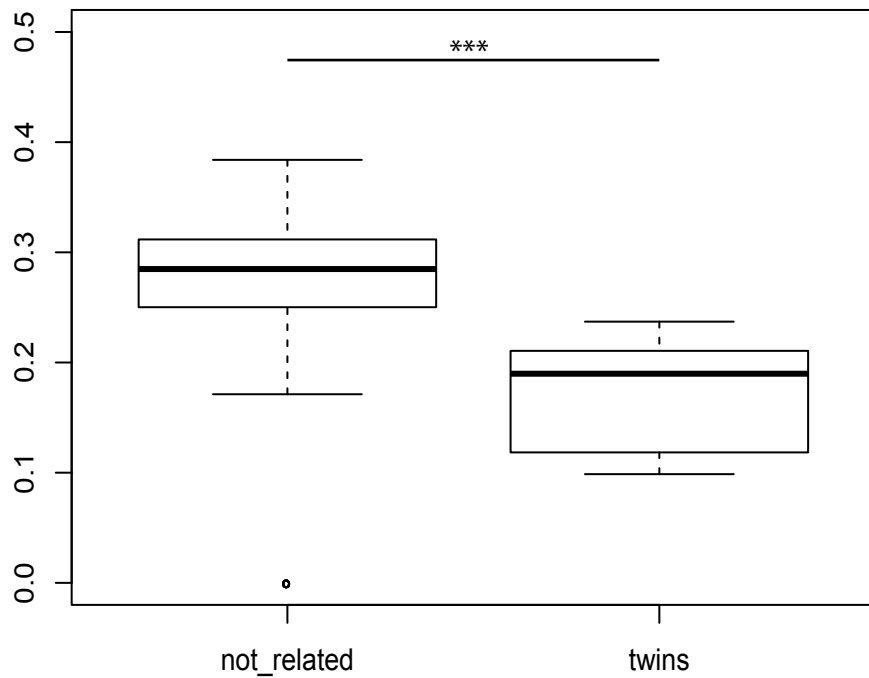

Week 24

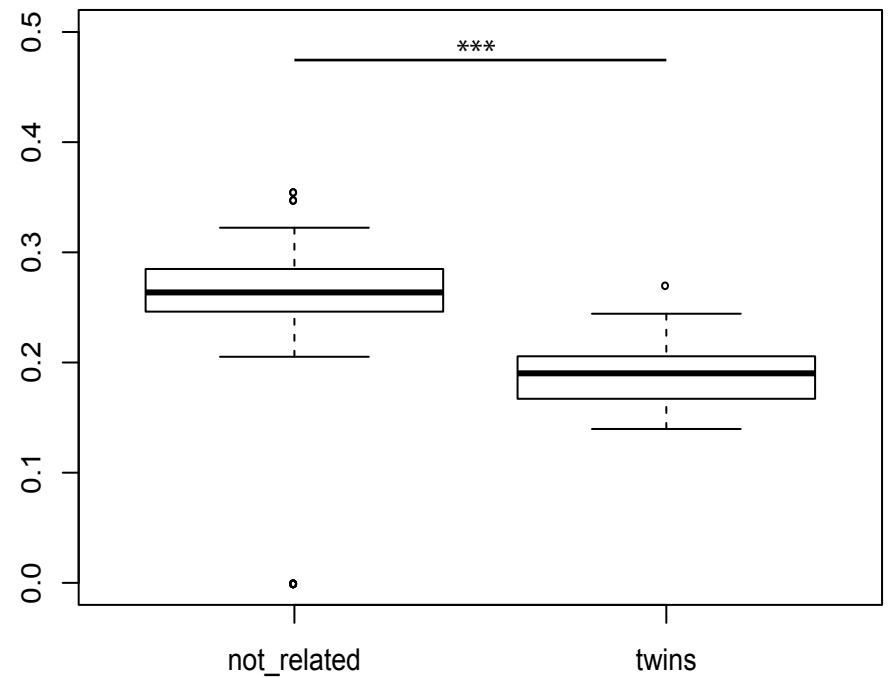

Supplement: 40168_2016_213_MOESM4_ESM.pdf [file 40168_2016_213_MOESM4_ESM.pdf]
